# Supplementary material for: Cheating on the mutualistic contract: nutritional gain through seed predation in the frugivorous bat Chiroderma villosum (Phyllostomidae)
Source: Oxford University Press journal article supplement (doi:10.1242/jeb.114322), 2015-04-01
Supplement: jeb114322_supp.pdf [file jeb114322_supp.pdf]

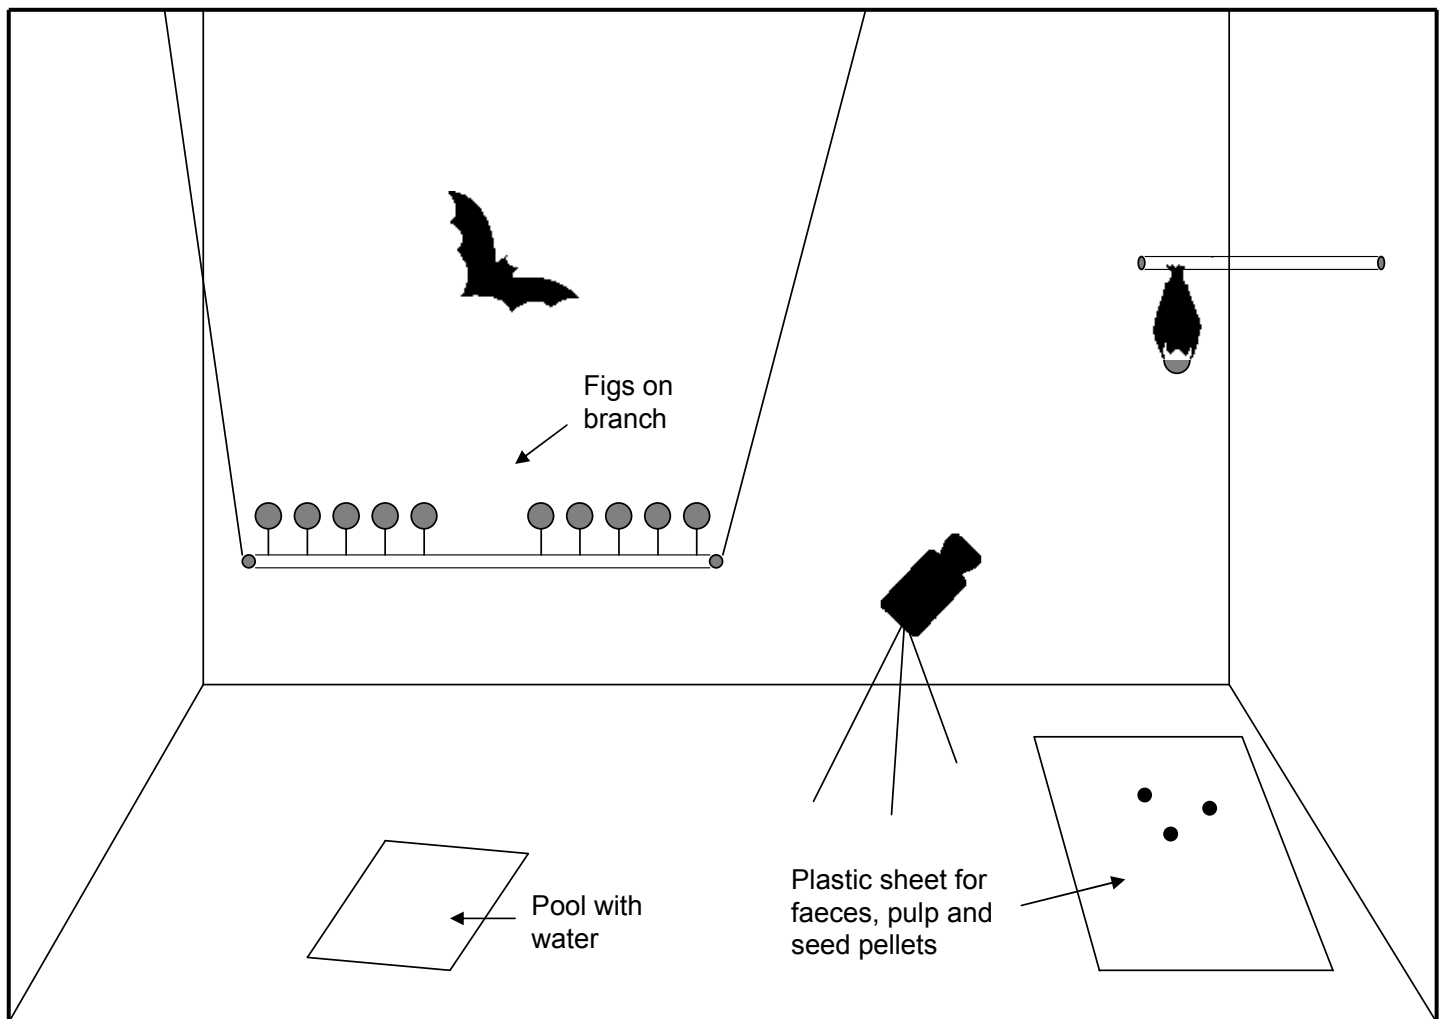

**Fig. S1.** Experimental setup in the flight cage (not true to scale).

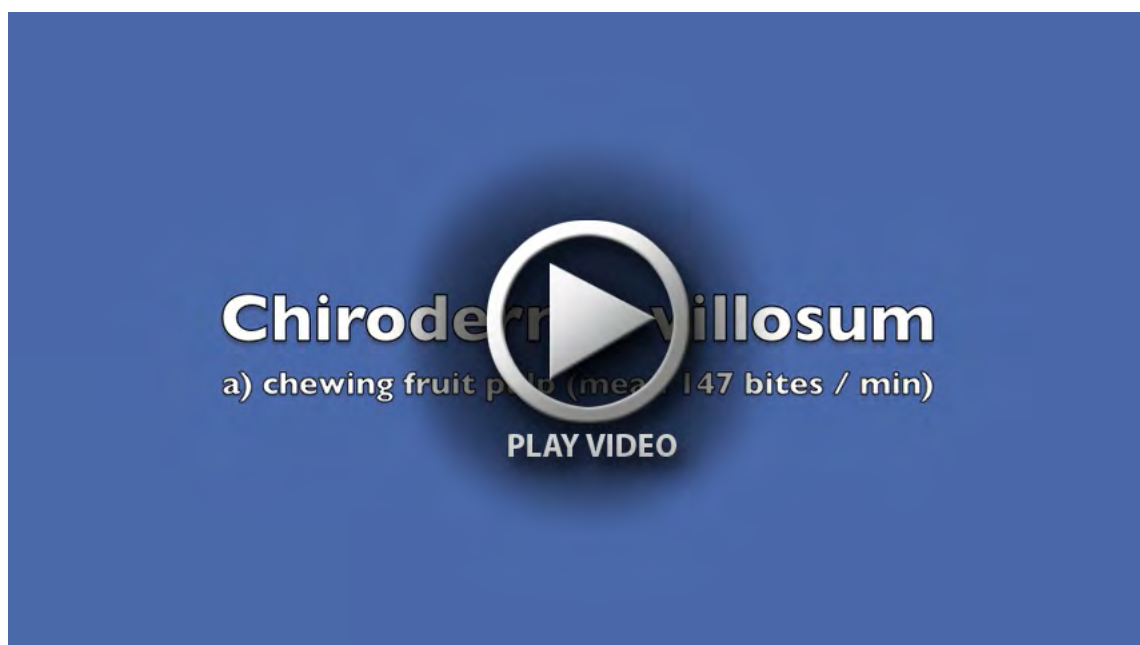

**Movie 1.** Feeding behaviour of *Chiroderma villosum* while a) chewing fruit pulp (mean 147 bites / min) and b) chewing seeds (mean 224 bites / min). Switch on the audio on your computer and hear the distinct cracking sounds during chewing of seeds.
